# Supplementary material for: Linear B-Cell Epitopes in Human Norovirus GII.4 Capsid Protein Elicit Blockade Antibodies
Source: Vaccines (Basel). 2021 Jan 14;9(1):52. doi: 10.3390/vaccines9010052 (PMC7830539; doi:10.3390/vaccines9010052)
Supplement: Supplementary file 1 [file vaccines-09-00052-s001.pdf]

## Supplementary Figure S1

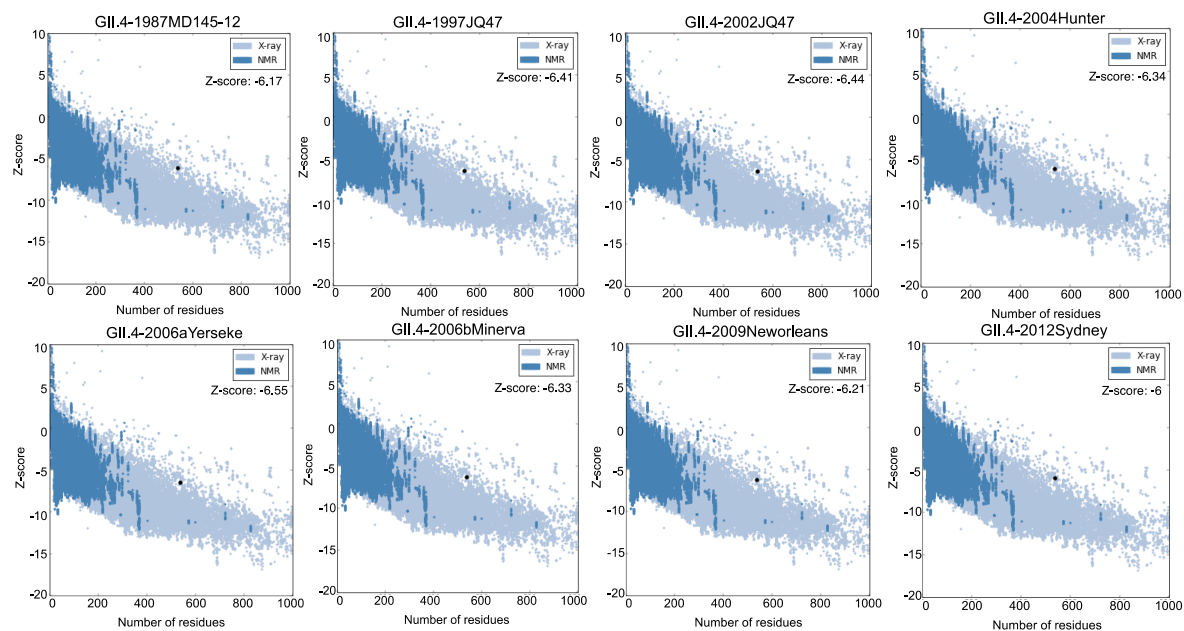

**Figure S1.** Scatter plots depict the modelled GII.4.VP1 structure validation by ProSA-web algorithm. The black dots reveals that all modeled structures falls within the series of scores found on related sized proteins with an X-ray quality.

## Supplementary Figure S2

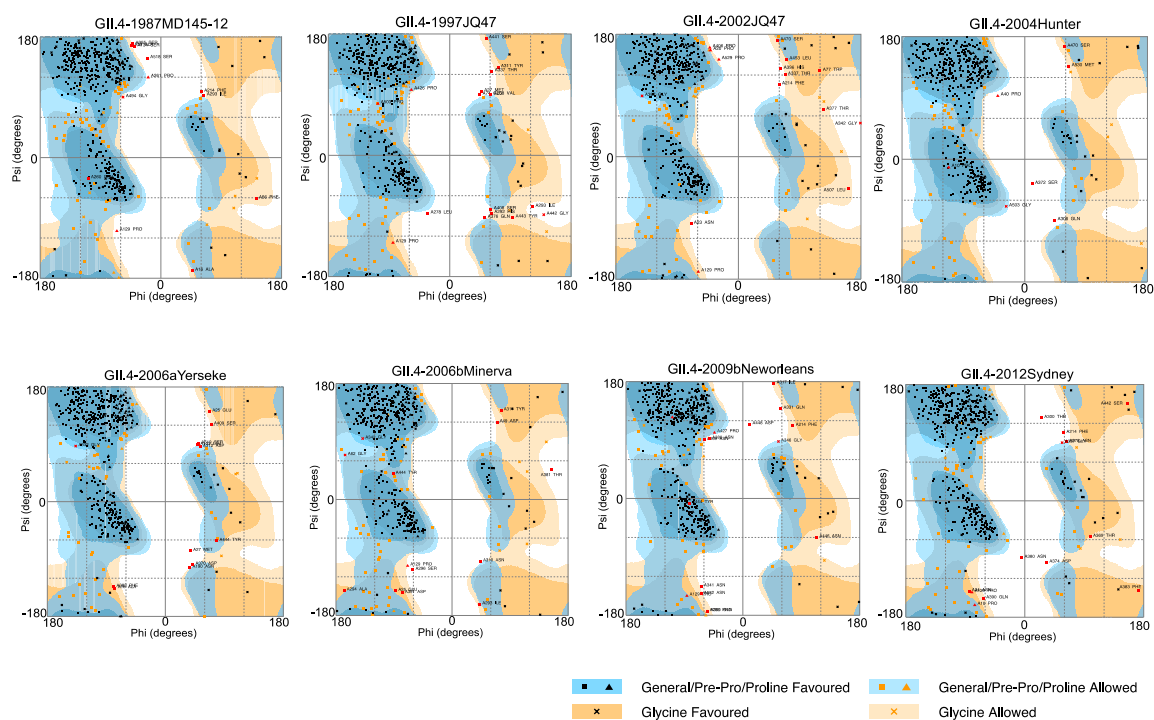

**Figure S2.** The Ramachandran plots of GII.4.VP1 protein structure models from different years.

## Supplementary Figure S3

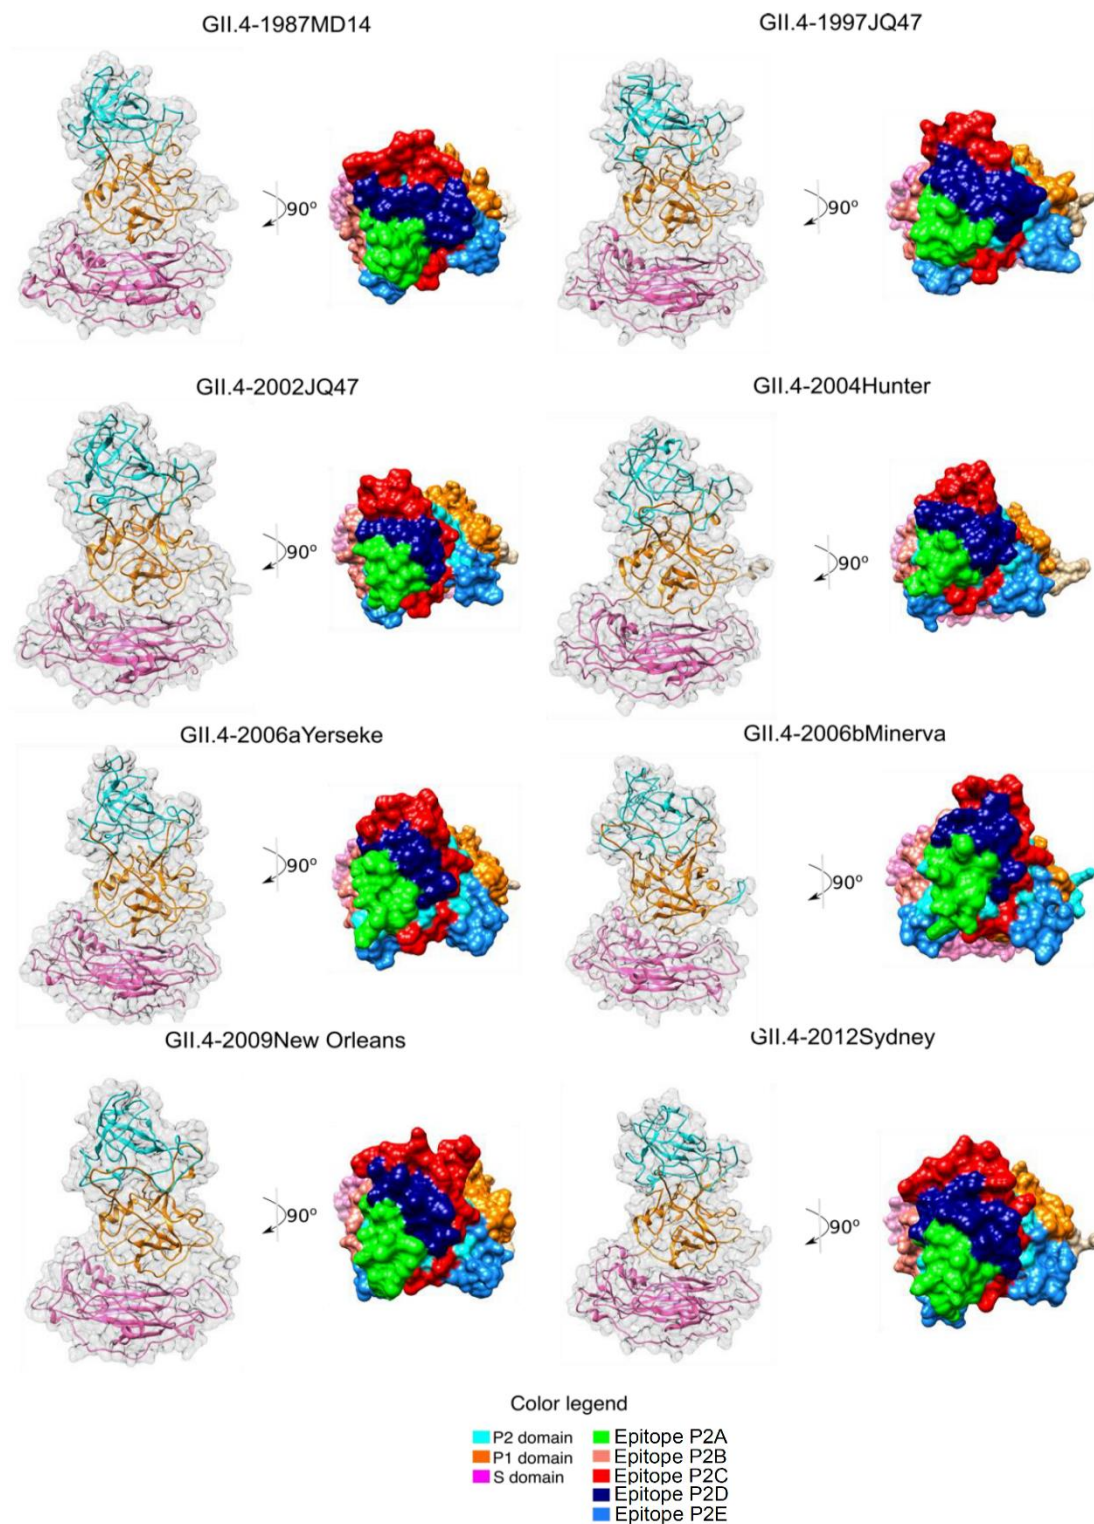

**Figure 3.** Three dimensional surface plots depicts the GII.4.VP1 structures color coded according to domain architecture (left side) and epitopes in P2 domain (right side).
